# Supplementary material
Source: PubMed Central journal article supplement (PMC11028599)
Supplement: 262_2011_1030_MOESM1_ESM.pdf [file 262_2011_1030_MOESM1_ESM.pdf]

Article:        **A Peptide Epitope Derived from the Cancer Testis Antigen HOM-MEL-40/SSX2 Capable of Inducing CD4<sup>+</sup> and CD8<sup>+</sup> T-Cell as well as B-cell Responses**

Journal:        Cancer Immunology and Immunotherapy

Authors:        Frank Neumann, Boris Kubuschok, Kubilay Ertan, Claudia Schormann, Stefan Stevanovic, Klaus-Dieter Preuss, Werner Schmidt, and Michael Pfreundschuh

Corresponding Author:        **Prof. Dr. med. Michael Pfreundschuh**  
Saarland University Medical School  
Internal Medicine I – Build. 40  
D-66424 Homburg  
michael.pfreundschuh@uks.eu

**Table SM-1: T-cell lines and clones applied in this study**

| <b>Patient</b> | <b>Cells used for <i>in vitro</i> stimulation</b> | <b>Peptide used for <i>in vitro</i> stimulation</b> | <b>Clones/Lines generated</b>                | <b>responsive to</b>             | <b>HLA context</b>     |           |
|----------------|---------------------------------------------------|-----------------------------------------------------|----------------------------------------------|----------------------------------|------------------------|-----------|
| <b>* #46</b>   | sorted CD8 <sup>+</sup> T cells                   | IMP / p58-66                                        | 2 CD8 <sup>+</sup> T-cell clones             | p58-66                           | A*0201                 |           |
| <b>** #24</b>  | sorted CD8 <sup>+</sup> T cells                   | SSX2 / p103-111                                     | 5 CD8 <sup>+</sup> T-cell clones             | p103-111                         | A*0201                 |           |
|                |                                                   |                                                     |                                              | p101-111                         |                        |           |
| <b>BC399</b>   | PBMC                                              | SSX2 / p98-112                                      | 1 CD4 <sup>+</sup> T-cell line (oligoclonal) | p98-112                          | DRB1*0101              |           |
|                |                                                   |                                                     |                                              | p101-115                         | DRB1*0101<br>DRB1*0701 |           |
|                | PBMC                                              | SSX2 / p101-115                                     | 1 CD4 <sup>+</sup> T-cell line (oligoclonal) | p98-112                          | DRB1*0101              |           |
|                |                                                   |                                                     |                                              | p101-115                         | DRB1*0101<br>DRB1*0701 |           |
| <b>BC418</b>   | PBMC                                              | SSX2 / p98-112                                      | 8 CD4 <sup>+</sup> T-cell clones             | p98-112                          | DRB1*0101              |           |
|                |                                                   |                                                     |                                              | p101-115                         |                        |           |
|                |                                                   |                                                     |                                              | p101-111                         |                        |           |
| <b>COL13</b>   | PBMC                                              | SSX2 / p101-111                                     | 1 CD8 <sup>+</sup> T-cell line (oligoclonal) | p101-111                         | A*0201                 |           |
| <b>BC699</b>   | sorted CD8 <sup>+</sup> T cells                   | SSX2 / p101-111                                     | 5 CD8 <sup>+</sup> T-cell clones             | p101-111                         | A*0201                 |           |
|                |                                                   |                                                     |                                              | p103-111                         |                        |           |
|                | PBMC                                              | SSX2 / p101-111                                     | 3 CD8 <sup>+</sup> T-cell clones             | p101-111                         | A*0201                 |           |
|                |                                                   |                                                     |                                              | p103-111                         |                        |           |
|                |                                                   |                                                     |                                              | 2 CD4 <sup>+</sup> T-cell clones | p98-112                | DRB1*0101 |
|                |                                                   |                                                     |                                              |                                  | p101-111               |           |
|                | p101-115                                          |                                                     |                                              |                                  |                        |           |

\* derived from a former study focused on IMP-derived MHC-I epitopes

\*\* derived from a former study focused on SSX2-derived MHC-I epitopes

**Table SM-2: Subtype-specific dissection of the restriction of the T-cell response of BC399 lines #98 and #101 by recognition of allogeneic APCs with partial HLA-DR identity.**

| Allogeneic APCs<br>Pulsed with <b>p98-112</b> |           |             |      | T-cell response by the lines<br><b>#98 and #101</b> |      |      |
|-----------------------------------------------|-----------|-------------|------|-----------------------------------------------------|------|------|
|                                               |           |             |      | HLA-DRB1*                                           | 0101 | 0701 |
|                                               |           |             |      | HLA-DRB4*                                           | -    | 0101 |
| <b>SK-MEL-37</b>                              | HLA-DRB1* | <b>0101</b> | 0301 | <b>Yes</b>                                          |      |      |
|                                               | HLA-DRB3* | 0202        | -    |                                                     |      |      |
| <b>LCL BC418</b>                              | HLA-DRB1* | <b>0101</b> | 0301 | <b>Yes</b>                                          |      |      |
|                                               | HLA-DRB3* | 0201        | -    |                                                     |      |      |
| <b>LCL Co149</b>                              | HLA-DRB1* | <b>0101</b> | 1501 | <b>Yes</b>                                          |      |      |
|                                               | HLA-DRB5* | -           | 0101 |                                                     |      |      |
| <b>LCL Co17</b>                               | HLA-DRB1* | <b>0701</b> | 1101 | <b>No</b>                                           |      |      |
|                                               | HLA-DRB3* | -           | 0202 |                                                     |      |      |
|                                               | HLA-DRB4* | 0103N       | -    |                                                     |      |      |
| <b>LCL BC355</b>                              | HLA-DRB1* | <b>0701</b> | 1302 | <b>No</b>                                           |      |      |
|                                               | HLA-DRB3* | -           | 0301 |                                                     |      |      |
|                                               | HLA-DRB4* | 0101        | -    |                                                     |      |      |

The table summarizes the results of IFN- $\gamma$  ELISPOT assays. HLA-DR subtypes shared by allogeneic APCs and effector cells are printed bold. “Yes” indicates a significant specific IFN- $\gamma$  release restricted to the common subtype. “No” indicates that no significant response was observed in the context of the corresponding HLA-DR constellation.

**Table SM-3: Subtype-specific dissection of the restriction of the T-cell response of BC399 lines #98 and #101 by recognition of allogeneic APCs with partial HLA-DR identity.**

| Allogeneic APCs<br>Pulsed with p101-115 |           |             |      | T-cell response by the lines<br>#98 and #101 |      |      |
|-----------------------------------------|-----------|-------------|------|----------------------------------------------|------|------|
|                                         |           |             |      | HLA-DRB1*                                    | 0101 | 0701 |
|                                         |           |             |      | HLA-DRB4*                                    | -    | 0101 |
| <b>SK-MEL-37</b>                        | HLA-DRB1* | <b>0101</b> | 0301 | <b>Yes</b>                                   |      |      |
|                                         | HLA-DRB3* | 0202        | -    |                                              |      |      |
| <b>LCL BC418</b>                        | HLA-DRB1* | <b>0101</b> | 0301 | <b>Yes</b>                                   |      |      |
|                                         | HLA-DRB3* | 0201        | -    |                                              |      |      |
| <b>LCL Co149</b>                        | HLA-DRB1* | <b>0101</b> | 1501 | <b>Yes</b>                                   |      |      |
|                                         | HLA-DRB5* | -           | 0101 |                                              |      |      |
| <b>LCL Co17</b>                         | HLA-DRB1* | <b>0701</b> | 1101 | <b>Yes</b>                                   |      |      |
|                                         | HLA-DRB3* | -           | 0202 |                                              |      |      |
|                                         | HLA-DRB4* | 0103N       | -    |                                              |      |      |
| <b>LCL Co89</b>                         | HLA-DRB1* | <b>0701</b> | 1201 | <b>Yes</b>                                   |      |      |
|                                         | HLA-DRB3* | -           | 0202 |                                              |      |      |
|                                         | HLA-DRB4* | 0103        | -    |                                              |      |      |

The table summarizes the results of IFN- $\gamma$  ELISPOT assays. HLA-DR subtypes shared by allogeneic APCs and effector cells are printed bold. “Yes” indicates a significant specific IFN- $\gamma$  release restricted to the common subtype. “No” indicates that no significant response was observed in the context of the corresponding HLA-DR constellation.

**Table SM-4: Subtype-specific dissection of the restriction of the T-cell response of BC418 T-cell clone #10 (primed with p98-112) by recognition of allogeneic APCs with partial HLA-DR identity.**

| Allogeneic APCs<br>pulsed with p98-112, p101-111, or p101-115 |           |             |             | T-cell response by clone #10 |           |
|---------------------------------------------------------------|-----------|-------------|-------------|------------------------------|-----------|
|                                                               |           |             |             | HLA-DRB1*                    | HLA-DRB3* |
|                                                               |           |             |             | 0101                         | 0301      |
|                                                               |           |             |             | HLA-DRB3*                    | 0202      |
|                                                               |           |             |             | 0202                         | -         |
| <b>LCL BC399</b>                                              | HLA-DRB1* | <b>0101</b> | 0701        | <b>Yes</b>                   |           |
|                                                               | HLA-DRB4* | -           | 0101        |                              |           |
| <b>LCL Co89</b>                                               | HLA-DRB1* | 0701        | 1201        | <b>No</b>                    |           |
|                                                               | HLA-DRB3* | -           | <b>0202</b> |                              |           |
|                                                               | HLA-DRB4* | 0103        | -           |                              |           |
| <b>LCL AlaBM</b>                                              | HLA-DRB1* | <b>0101</b> | 1501        | <b>Yes</b>                   |           |
|                                                               | HLA-DRB5* | -           | 0101        |                              |           |
| <b>LCL C0125</b>                                              | HLA-DRB1* | <b>0301</b> | 1101        | <b>No</b>                    |           |
|                                                               | HLA-DRB3* | 0101        | <b>0202</b> |                              |           |
| <b>LCL PC 1</b>                                               | HLA-DRB1* | <b>0301</b> | 0803        | <b>No</b>                    |           |
|                                                               | HLA-DRB3* | 0101        | -           |                              |           |

The table summarizes the results of IFN- $\gamma$  ELISPOT assays. HLA-DR subtypes shared by allogeneic APCs and effector cells are printed bold. “Yes” indicates a significant specific IFN- $\gamma$  release restricted to the common subtype. “No” indicates that no significant response was observed in the context of the corresponding HLA-DR constellation.
